# Supplementary material for: Programmed Death Ligand-1 (PD-L1) Is an Independent Negative Prognosticator in Western-World Gallbladder Cancer
Source: PubMed Central journal article supplement (PMC8038183; doi:10.3390/cancers13071682), 2021-04-02
Supplement: cancers-13-01682-s001.pdf [file cancers-13-01682-s001.pdf]

Supplementary Material

# Programmed death ligand-1 (PD-L1) is an independent negative prognosticator in Western-world gallbladder cancer

Thomas Albrecht et. al.

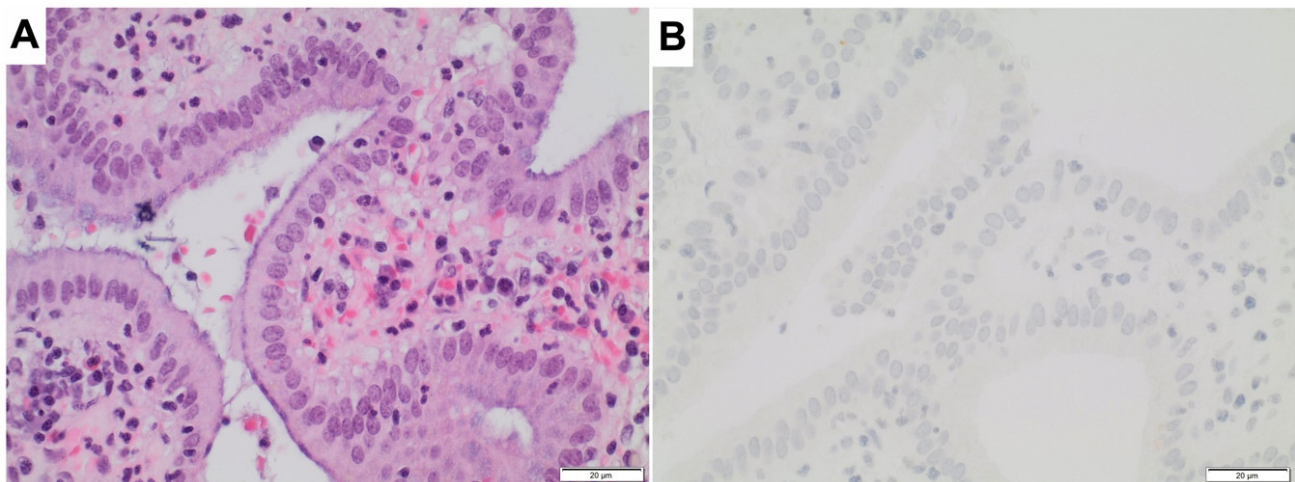

**Figure S1.** PD-L1 expression in chronic cholecystitis. Representative microphotographs of chronic cholecystitis specimens (A) (HE), which were uniformly negative for PD-L1 expression by immunohistochemistry (B), both in the epithelium and immune cells. Original magnification 400X.

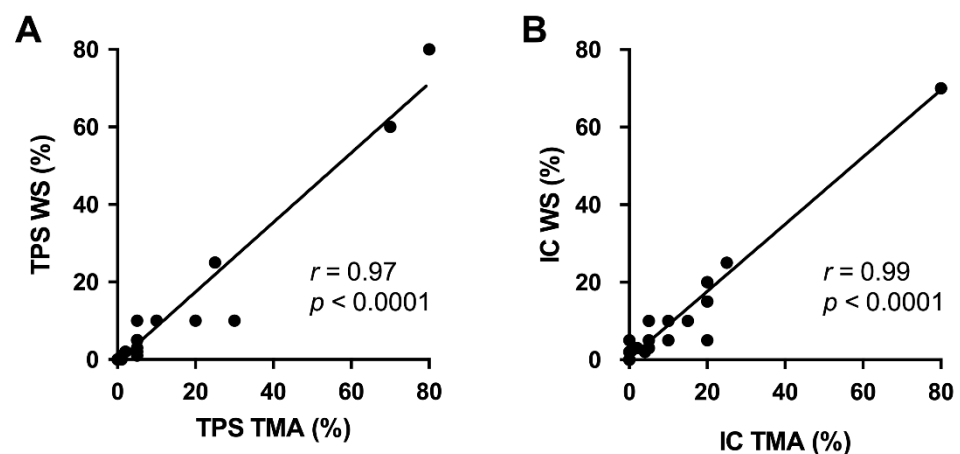

**Figure S2.** Correlation analysis of PD-L1 on tissue microarrays and whole slides. PD-L1 immunohistochemistry was repeated on whole slides of all 19 samples with tumoral PD-L1 positivity and an equal number of randomly selected negative samples. Correlation analysis of both the Tumor Proportion Score (TPS) (A) and Immune Cell Score (IC) (B) assessed on the tissue microarray with the results of corresponding whole slide (WS) revealed high agreement of both approaches.

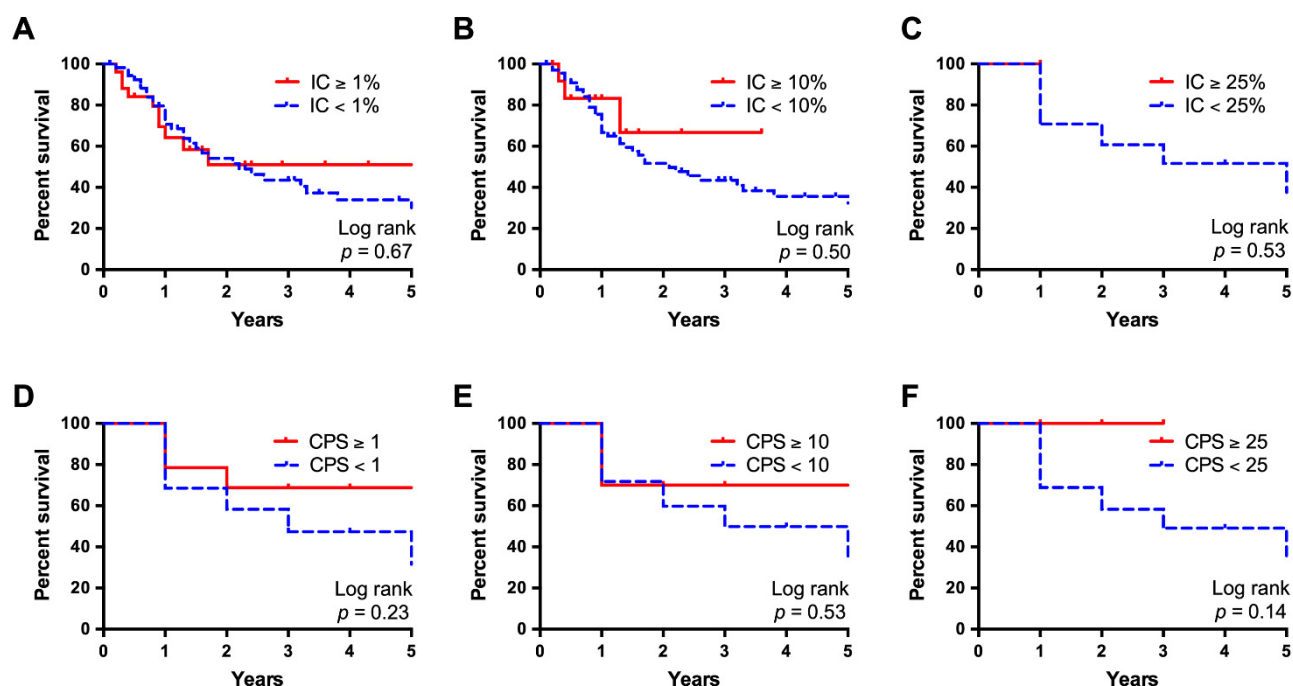

**Figure S3.** Kaplan-Meier survival analysis, stratified for Immune Cell Score and Combined Positivity Score. Irrespective of the cut-off point, no significant differences in survival were detected both for the Immune Cell Score (IC) and Combined Positivity Score (CPS). Upper panel: Survival curves for IC cut-off points at 1% (A), 10% (B) and 25% (C). Lower panel: Survival curves for CPS cut-off points at 1 (D), 10 (E) and 25 (F). *P*-values were calculated using the log-rank test.

**Table S1.** Clinicopathological characteristics (at 1% TPS cutoff).

| Characteristic | PD-L1 neg.<br>(<1%) | PD-L1 pos.<br>(≥1%) | <i>p</i> -Value |
|----------------|---------------------|---------------------|-----------------|
| GBC patients   | 110 (85.3%)         | 19 (14.7%)          |                 |
| Age (years)    | 72.6 (63.6–79.1)    | 75.8 (64.1–80.4)    | 0.67            |
| Sex            |                     |                     |                 |
| Female         | 39 (35.5)           | 4 (21.1%)           | 0.30            |
| Male           | 71 (64.5%)          | 15 (78.9%)          |                 |
| Histology      |                     |                     |                 |
| NOS            | 52 (47.3%)          | 11 (57.9%)          | *0.40           |
| Mucinous       | 18 (16.4%)          | 1 (5.3%)            |                 |
| Adenosquamous  | 13 (11.8%)          | 3 (15.8%)           |                 |
| Signet ring    | 14 (12.7%)          | 2 (10.5%)           |                 |
| Papillary      | 10 (9.1%)           | 0 (0%)              |                 |
| Solid          | 1 (0.9%)            | 2 (10.5%)           |                 |
| Intestinal     | 2 (1.8%)            | 0 (0%)              |                 |
| UICC           |                     |                     |                 |
| 1              | 0 (0%)              | 0 (0%)              | *0.46           |
| 2              | 14 (15.9%)          | 1 (5.9%)            |                 |
| 3              | 51 (58.0%)          | 13 (76.5%)          |                 |
| 4              | 23 (26.1%)          | 3 (17.6%)           |                 |
| NA             | 22                  | 2                   |                 |
| pT             |                     |                     |                 |
| 1              | 5 (4.5%)            | 1 (5.3%)            | *0.08           |
| 2              | 49 (44.5%)          | 4 (21.0%)           |                 |
| 3              | 49 (44.5%)          | 13 (68.4%)          |                 |

|         |            |            |        |
|---------|------------|------------|--------|
| 4       | 7 (6.5%)   | 1 (5.3%)   |        |
| pN      |            |            |        |
| 0       | 26 (46.4%) | 2 (20.0%)  |        |
| 1       | 30 (53.6%) | 8 (80.0%)  | 0.34   |
| X       | 54         | 9          |        |
| pM      |            |            |        |
| 1       | 20 (18.2%) | 2 (10.5%)  |        |
| X       | 90 (81.8%) | 17 (89.5%) | 0.53   |
| L       |            |            |        |
| 0       | 40 (36.4%) | 8 (42.1%)  |        |
| 1       | 70 (63.6%) | 11 (57.9%) | 0.62   |
| V       |            |            |        |
| 0       | 49 (44.5%) | 10 (52.6%) |        |
| 1       | 61 (55.5%) | 9 (47.4%)  | 0.62   |
| Pn      |            |            |        |
| 0       | 56 (50.9%) | 11 (57.9%) |        |
| 1       | 54 (49.1%) | 8 (42.1%)  | 0.63   |
| R       |            |            |        |
| 0       | 40 (45.4%) | 9 (56.2%)  |        |
| 1       | 42 (47.7%) | 7 (43.8%)  |        |
| 2       | 6 (6.8%)   | 0 (0%)     | *0.59  |
| X       | 22         | 3          |        |
| Grading |            |            |        |
| G1      | 5 (4.5%)   | 0 (0%)     |        |
| G2      | 70 (63.6%) | 7 (36.8%)  | *0.018 |
| G3      | 35 (31.8%) | 12 (63.2%) |        |

Fisher's exact test,  $\chi^2$  test or Mann-Whitney test (age) were used. \*denotes NOS+mucinous+papillary+intestinal vs. adenosquamous+signet ring+solid; UICC 1 + 2 vs. 3 + 4; pT1+2 vs. 3 + 4; R0 vs. R1 + 2; G1 + 2 vs. G3. Abbreviations: GBC, gallbladder cancer; UICC, Union for International Cancer Control.

**Table S2.** Clinicopathological characteristics (at 25% TPS cutoff).

| Characteristic | PD-L1 neg.<br>(TPS < 25%) | PD-L1 pos.<br>(TPS ≥ 25%) | p-value |
|----------------|---------------------------|---------------------------|---------|
| GBC patients   | 125 (96.9%)               | 4 (3.1%)                  |         |
| Age (years)    | 72.9 (63.7–80.0)          | 71.8 (61.6–80.8)          | 0.89    |
| Sex            |                           |                           |         |
| Female         | 82 (65.6%)                | 4 (100%)                  |         |
| Male           | 43 (34.4%)                | 0 (0%)                    | 0.30    |
| Histology      |                           |                           |         |
| NOS            | 62 (49.6%)                | 1 (25.0%)                 |         |
| Mucinous       | 19 (15.2%)                | 0 (0%)                    |         |
| Adenosquamous  | 15 (12.0%)                | 1 (25.0%)                 |         |
| Signet ring    | 15 (12.0%)                | 1 (25.0%)                 | *0.06   |
| Papillary      | 10 (8.0%)                 | 0 (0%)                    |         |
| Solid          | 2 (1.6%)                  | 1 (25.0%)                 |         |
| Intestinal     | 2 (1.6%)                  | 0 (0%)                    |         |

|         |             |           |        |
|---------|-------------|-----------|--------|
| UICC    |             |           |        |
| 1       | 0 (0%)      | 0 (0%)    |        |
| 2       | 15 (14.9%)  | 0 (0%)    |        |
| 3       | 60 (59.4%)  | 4 (100%)  | *1.00  |
| 4       | 26 (25.7%)  | 0 (0%)    |        |
| NA      | 24          | 0         |        |
| pT      |             |           |        |
| 1       | 6 (4.8%)    | 0 (0%)    |        |
| 2       | 52 (41.6%)  | 1 (25.0%) | *0.62  |
| 3       | 59 (47.2%)  | 3 (75.0%) |        |
| 4       | 8 (6.4%)    | 0 (0%)    |        |
| pN      |             |           |        |
| 0       | 27 (42.9%)  | 0 (0%)    |        |
| 1       | 36 (57.1%)  | 3 (100%)  | 0.34   |
| X       | 62          | 1         |        |
| pM      |             |           |        |
| 1       | 22 (17.6%)  | 0 (0%)    | 1.00   |
| X       | 103 (82.4%) | 4 (100%)  |        |
| L       |             |           |        |
| 0       | 48 (38.4%)  | 0 (0%)    | 0.30   |
| 1       | 77 (61.6%)  | 4 (100%)  |        |
| V       |             |           |        |
| 0       | 59 (47.2%)  | 1 (25.0%) | 0.62   |
| 1       | 66 (52.8%)  | 3 (75.0%) |        |
| Pn      |             |           |        |
| 0       | 64 (51.2%)  | 3 (75.0%) | 0.62   |
| 1       | 61 (48.8%)  | 1 (25.0%) |        |
| R       |             |           |        |
| 0       | 46 (46.0%)  | 3 (75.0%) |        |
| 1       | 48 (48.0%)  | 1 (25.0%) | *0.34  |
| 2       | 6 (6.0%)    | 0 (0%)    |        |
| X       | 25          | 0         |        |
| Grading |             |           |        |
| G1      | 5 (4.0%)    | 0 (0%)    |        |
| G2      | 77 (61.5%)  | 0 (0%)    | *0.016 |
| G3      | 43 (34.4%)  | 4 (100%)  |        |

Fisher's exact test,  $\chi^2$  test or Mann-Whitney test (age) were used. \*denotes NOS+mucinous+papillary+intestinal vs. adenosquamous+signet ring+solid; UICC 1+2 vs. 3+4; pT1+2 vs. 3+4; R0 vs. R1+2; G1+2 vs. G3. Abbreviations: GBC, gallbladder cancer; UICC, Union for International Cancer Control.

**Table S3.** Clinicopathological characteristics (at 1% IC cutoff).

| Characteristic | PD-L1 neg.<br>(IC < 1%) | PD-L1 pos.<br>(IC ≥ 1%) | p-value |
|----------------|-------------------------|-------------------------|---------|
| GBC patients   | 86 (66.7%)              | 43 (33.3%)              |         |
| Age (years)    | 72.9 (63.5–81.7)        | 73.40 (64.7–78.2)       | 0.80    |
| Sex            |                         |                         |         |
| Female         | 56 (65.1%)              | 30 (69.8%)              | 0.69    |
| Male           | 30 (34.9%)              | 13 (30.2%)              |         |

|               |            |            |               |
|---------------|------------|------------|---------------|
| Histology     |            |            |               |
| NOS           | 43 (50.0%) | 20 (46.5%) |               |
| Mucinous      | 15 (17.4%) | 4 (9.3%)   |               |
| Adenosquamous | 7 (8.1%)   | 9 (20.9%)  | <b>*0.035</b> |
| Signet ring   | 10 (11.6%) | 6 (14.0%)  |               |
| Papillary     | 8 (9.3%)   | 2 (4.7%)   |               |
| Solid         | 1 (1.2%)   | 2 (4.7%)   |               |
| Intestinal    | 2 (2.4%)   | 0 (0%)     |               |
| UICC          |            |            |               |
| 1             | 0 (0%)     | 0 (0%)     |               |
| 2             | 12 (17.9%) | 3 (7.9%)   |               |
| 3             | 41 (61.2%) | 23 (60.5%) | <b>*0.25</b>  |
| 4             | 14 (20.9%) | 12 (31.6%) |               |
| NA            | 19         | 5          |               |
| pT            |            |            |               |
| 1             | 5 (5.8%)   | 1 (2.3%)   |               |
| 2             | 39 (45.3%) | 14 (32.6%) | <b>*0.09</b>  |
| 3             | 39 (45.3%) | 23 (53.5%) |               |
| 4             | 3 (3.5%)   | 5 (11.6%)  |               |
| pN            |            |            |               |
| 0             | 21 (47.7%) | 6 (27.3%)  |               |
| 1             | 23 (52.3%) | 16 (72.7%) | 0.28          |
| X             | 42         | 21         |               |
| pM            |            |            |               |
| 1             | 14 (16.3%) | 8 (18.6%)  | 0.81          |
| X             | 72 (83.7%) | 35 (81.4%) |               |
| L             |            |            |               |
| 0             | 29 (33.7%) | 19 (44.2%) | 0.25          |
| 1             | 57 (66.3%) | 24 (55.8%) |               |
| V             |            |            |               |
| 0             | 37 (43.0%) | 22 (51.2%) | 0.45          |
| 1             | 49 (57.0%) | 21 (48.8%) |               |
| Pn            |            |            |               |
| 0             | 44 (51.2%) | 23 (53.5%) | 0.85          |
| 1             | 42 (48.8%) | 20 (46.5%) |               |
| R             |            |            |               |
| 0             | 30 (44.1%) | 19 (52.8%) |               |
| 1             | 33 (48.5%) | 16 (44.4%) |               |
| 2             | 5 (7.4%)   | 1 (2.8%)   | <b>*0.42</b>  |
| X             | 18         | 7          |               |
| Grading       |            |            |               |
| G1            | 3 (3.5%)   | 2 (4.7%)   |               |
| G2            | 56 (65.1%) | 21 (48.8%) | <b>*0.12</b>  |
| G3            | 27 (31.4%) | 20 (46.5%) |               |

Fisher's exact test,  $\chi^2$  test or Mann-Whitney test (age) were used. \*denotes NOS+mucinous+papillary+intestinal vs. adenosquamous+signet ring+solid; UICC 1 + 2 vs. 3 + 4; pT1 + 2 vs. 3 + 4; R0 vs. R1 + 2; G1 + 2 vs. G3. Abbreviations: GBC, gallbladder cancer; UICC, Union for International Cancer Control.

**Table S4.** Clinicopathological characteristics (at 10% IC cutoff).

| Characteristic | PD-L1 neg.<br>(IC < 10%) | PD-L1 pos.<br>(IC ≥ 10%) | <i>p</i> -value |
|----------------|--------------------------|--------------------------|-----------------|
| GBC patients   | 109 (84.5%)              | 20 (15.5%)               |                 |
| Age (years)    | 72.6 (63.6–80.0)         | 75.60 (64.6–80.0)        | 0.62            |
| Sex            |                          |                          |                 |
| Female         | 73 (67.0%)               | 13 (65.0%)               | 1.00            |
| Male           | 36 (33.0%)               | 7 (35.0%)                |                 |
| Histology      |                          |                          |                 |
| NOS            | 53 (48.6%)               | 10 (50.0%)               | *0.18           |
| Mucinous       | 17 (15.6%)               | 2 (10.0%)                |                 |
| Mdenosquamous  | 11 (10.1%)               | 5 (25.0%)                |                 |
| Signet ring    | 14 (12.8%)               | 2 (10.0%)                |                 |
| Papillary      | 10 (9.2%)                | 0 (0.0%)                 |                 |
| Dolid          | 2 (1.8%)                 | 1 (5.0%)                 |                 |
| Intestinal     | 2 (1.8%)                 | 0 (0.0%)                 |                 |
| UICC           |                          |                          |                 |
| 1              | 0 (0%)                   | 0 (0%)                   | *0.30           |
| 2              | 14 (16.3%)               | 1 (5.3%)                 |                 |
| 3              | 49 (57.0%)               | 15 (78.9%)               |                 |
| 4              | 23 (26.7%)               | 3 (15.8%)                |                 |
| NA             | 23                       | 1                        |                 |
| pT             |                          |                          |                 |
| 1              | 6 (5.5%)                 | 0 (0%)                   | *0.34           |
| 2              | 46 (42.2 %)              | 7 (35.0%)                |                 |
| 3              | 50 (45.9%)               | 12 (60.0%)               |                 |
| 4              | 7 (6.4%)                 | 1 (5.0%)                 |                 |
| pN             |                          |                          |                 |
| 0              | 25 (45.5%)               | 2 (18.2%)                | 0.24            |
| 1              | 30 (55.5%)               | 9 (81.8%)                |                 |
| X              | 54                       | 9                        |                 |
| pM             |                          |                          |                 |
| 1              | 20 (18.3%)               | 2 (10.0%)                | 0.52            |
| X              | 89 (81.7%)               | 18 (90.0%)               |                 |
| L              |                          |                          |                 |
| 0              | 38 (34.9%)               | 10 (50.0%)               | 0.22            |
| 1              | 71 (65.1%)               | 10 (50.0%)               |                 |
| V              |                          |                          |                 |
| 0              | 47 (43.1%)               | 12 (60.0%)               | 0.22            |
| 1              | 62 (56.9%)               | 8 (40.0%)                |                 |
| Pn             |                          |                          |                 |
| 0              | 56 (51.4%)               | 11 (55%)                 | 0.81            |
| 1              | 53 (48.6%)               | 9 (45%)                  |                 |
| R              |                          |                          |                 |
| 0              | 39 (44.8%)               | 10 (58.8%)               | *0.30           |
| 1              | 42 (48.3%)               | 7 (41.2%)                |                 |
| 2              | 6 (6.9%)                 | 0 (0%)                   |                 |
| X              | 22                       | 3                        |                 |

## Grading

|    |            |            |       |
|----|------------|------------|-------|
| G1 | 4 (3.7%)   | 1 (5%)     |       |
| G2 | 68 (62.4%) | 9 (45.0%)  | *0.21 |
| G3 | 37 (33.9%) | 10 (50.0%) |       |

Fisher's exact test,  $\chi^2$  test or Mann-Whitney test (age) were used. \*denotes NOS+mucinous+papillary+intestinal vs. adenosquamous+signet ring+solid; UICC 1 + 2 vs. 3 + 4; pT1 + 2 vs. 3 + 4; R0 vs. R1 + 2; G1 + 2 vs. G3. Abbreviations: GBC, gallbladder cancer; UICC, Union for International Cancer Control.

**Table S5.** Clinicopathological characteristics (at 25% IC cutoff).

| Characteristic | PD-L1 neg.<br>(IC < 25%) | PD-L1 pos.<br>(IC ≥ 25%) | p-value |
|----------------|--------------------------|--------------------------|---------|
| GBC patients   | 125 (96.9%)              | 4 (3.1%)                 |         |
| Age (years)    | 73.0 (63.9–80.2)         | 64.2 (51.5–72.2)         | 0.12    |
| Sex            |                          |                          |         |
| Female         | 83 (66.4%)               | 3 (75.0%)                |         |
| Male           | 42 (33.6%)               | 1 (25.0%)                | 1.00    |
| Histology      |                          |                          |         |
| NOS            | 63 (50.4%)               | 0 (0%)                   |         |
| Mucinous       | 19 (15.2%)               | 0 (0%)                   |         |
| Adenosquamous  | 14 (11.2%)               | 3 (75.0%)                |         |
| Signet ring    | 14 (11.2%)               | 1 (25.0%)                | *0.005  |
| Papillary      | 10 (8.0%)                | 0 (0.0%)                 |         |
| Solid          | 3 (2.4%)                 | 0 (0.0%)                 |         |
| Intestinal     | 2 (1.6%)                 | 0 (0.0%)                 |         |
| UICC           |                          |                          |         |
| 1              | 0 (0%)                   | 0 (0%)                   |         |
| 2              | 15 (14.9%)               | 0 (0%)                   |         |
| 3              | 61 (60.4%)               | 3 (75.0%)                | *1.00   |
| 4              | 25 (24.8%)               | 1 (25.0%)                |         |
| NA             | 24                       | 0                        |         |
| pT             |                          |                          |         |
| 1              | 6 (4.8%)                 | 0 (0%)                   |         |
| 2              | 52 (41.6%)               | 1 (25.0%)                |         |
| 3              | 59 (47.2%)               | 3 (75.0%)                | *0.62   |
| 4              | 8 (6.4%)                 | 0 (0%)                   |         |
| pN             |                          |                          |         |
| 0              | 26 (41.3%)               | 1 (33.3%)                |         |
| 1              | 37 (58.7%)               | 2 (66.7%)                | 0.96    |
| X              | 62                       | 1                        |         |
| pM             |                          |                          |         |
| 1              | 21 (16.8%)               | 1 (25.0%)                |         |
| X              | 104 (83.2%)              | 3 (75.0%)                | 0.53    |
| L              |                          |                          |         |
| 0              | 46 (36.8%)               | 2 (50.0%)                |         |
| 1              | 79 (63.2%)               | 2 (50.0%)                | 0.63    |
| V              |                          |                          |         |
| 0              | 57 (45.6%)               | 2 (50.0%)                |         |
| 1              | 68 (54.4%)               | 2 (50.0%)                | 1.00    |

|         |            |           |       |
|---------|------------|-----------|-------|
| Pn      |            |           |       |
| 0       | 65 (52.0%) | 2 (50.0%) | 1.00  |
| 1       | 60 (48.0%) | 2 (50.0%) |       |
| R       |            |           |       |
| 0       | 47 (47.0%) | 2 (50.0%) | *1.00 |
| 1       | 47 (47.0%) | 2 (50.0%) |       |
| 2       | 6 (6.0%)   | 0 (0%)    |       |
| X       | 25         | 0         |       |
| Grading |            |           |       |
| G1      | 5 (4.0%)   | 0 (0%)    | *0.14 |
| G2      | 76 (60.8%) | 1 (25.0%) |       |
| G3      | 44 (35.2%) | 3 (75.0%) |       |

Fisher's exact test,  $\chi^2$  test or Mann-Whitney test (age) were used. \*denotes NOS+mucinous+papillary+intestinal vs. adenosquamous+signet ring+solid; UICC 1 + 2 vs. 3 + 4; pT1+2 vs. 3 + 4; R0 vs. R1 + 2; G1 + 2 vs. G3. Abbreviations: GBC, gallbladder cancer; UICC, Union for International Cancer Control.

**Table S6.** Clinicopathological characteristics (at 1 CPS cutoff).

| Characteristic | PD-L1 neg.<br>(CPS < 1) | PD-L1 pos.<br>(CPS $\geq$ 1) | p-value |
|----------------|-------------------------|------------------------------|---------|
| GBC patients   | 84 (65.1%)              | 45 (34.9%)                   |         |
| Age (years)    | 72.9 (63.4–81.4)        | 73.40 (65.3–78.3)            | 0.88    |
| Sex            |                         |                              |         |
| Female         | 54 (64.3%)              | 32 (71.1%)                   | 0.56    |
| Male           | 30 (35.7%)              | 13 (28.9%)                   |         |
| Histology      |                         |                              |         |
| NOS            | 41 (48.8%)              | 22 (48.9%)                   | *0.06   |
| Mucinous       | 15 (17.9%)              | 4 (8.9%)                     |         |
| Adenosquamous  | 7 (8.3%)                | 9 (20.0%)                    |         |
| Signet ring    | 10 (11.9%)              | 6 (13.3%)                    |         |
| Papillary      | 8 (9.5%)                | 2 (4.4%)                     |         |
| Solid          | 1 (1.2%)                | 2 (4.4%)                     |         |
| Intestinal     | 2 (2.4%)                | 0 (0.0%)                     |         |
| UICC           |                         |                              |         |
| 1              | 0 (0%)                  | 0 (0%)                       | *0.16   |
| 2              | 12 (18.5%)              | 3 (7.5%)                     |         |
| 3              | 40 (61.5%)              | 24 (60.0%)                   |         |
| 4              | 13 (20.0%)              | 13 (32.5%)                   |         |
| NA             | 19                      | 5                            |         |
| pT             |                         |                              |         |
| 1              | 5 (6.0%)                | 1 (2.2%)                     | *0.043  |
| 2              | 39 (46.4%)              | 14 (31.1%)                   |         |
| 3              | 37 (44.0%)              | 25 (55.6%)                   |         |
| 4              | 3 (3.6%)                | 5 (11.1%)                    |         |
| pN             |                         |                              |         |
| 0              | 21 (50.0%)              | 6 (25.0%)                    | 0.14    |
| 1              | 21 (50.0%)              | 18 (75.0%)                   |         |
| X              | 42                      | 21                           |         |
| pM             |                         |                              |         |
| 1              | 13 (15.5%)              | 9 (20.0%)                    | 0.62    |
| X              | 71 (84.5%)              | 36 (80.0%)                   |         |



|         |            |            |       |  |
|---------|------------|------------|-------|--|
| L       |            |            |       |  |
| 0       | 29 (34.5%) | 19 (42.2%) | 0.45  |  |
| 1       | 55 (65.6%) | 26 (57.8%) |       |  |
| V       |            |            |       |  |
| 0       | 37 (44.0%) | 22 (48.9%) | 0.71  |  |
| 1       | 47 (56.0%) | 23 (51.1%) |       |  |
| Pn      |            |            |       |  |
| 0       | 44 (52.4%) | 23 (51.1%) | 1.00  |  |
| 1       | 40 (47.6%) | 22 (48.9%) |       |  |
| R       |            |            |       |  |
| 0       | 29 (43.9%) | 20 (52.6%) | *0.42 |  |
| 1       | 32 (48.5%) | 17 (44.7%) |       |  |
| 2       | 5 (7.6%)   | 1 (2.6%)   |       |  |
| X       | 18         | 7          |       |  |
| Grading |            |            |       |  |
| G1      | 3 (3.6%)   | 2 (4.4%)   | *0.09 |  |
| G2      | 55 (65.5%) | 22 (48.9%) |       |  |
| G3      | 26 (30.9%) | 21 (46.7%) |       |  |

Fisher's exact test,  $\chi^2$  test or Mann-Whitney test (age) were used. \*denotes NOS+mucinous+papillary+intestinal vs. adenosquamous+signet ring+solid; UICC 1 + 2 vs. 3 + 4; pT1 + 2 vs. 3 + 4; R0 vs. R1 + 2; G1 + 2 vs. G3. Abbreviations: GBC, gallbladder cancer; UICC, Union for International Cancer Control.

**Table S7.** Clinicopathological characteristics (at 10 CPS cutoff).

| Characteristic | PD-L1 neg.<br>(CPS < 10) | PD-L1 pos.<br>(CPS ≥ 10) | p-value |
|----------------|--------------------------|--------------------------|---------|
| GBC patients   | 103 (79.8%)              | 26 (20.2%)               |         |
| Age (years)    | 72.6 (63.6–80.0)         | 75.60 (63.5–80.1)        | 0.79    |
| Sex            |                          |                          |         |
| Female         | 68 (66.0%)               | 18 (69.2%)               | 0.82    |
| Male           | 35 (34.0%)               | 8 (30.8%)                |         |
| Histology      |                          |                          |         |
| NOS            | 50 (48.5%)               | 13 (50.0%)               | *0.22   |
| Mucinous       | 17 (16.5%)               | 2 (7.7%)                 |         |
| Adenosquamous  | 10 (9.7%)                | 6 (23.1%)                |         |
| Signet ring    | 14 (13.6%)               | 2 (7.7%)                 |         |
| Papillary      | 9 (8.7%)                 | 1 (3.8%)                 |         |
| Solid          | 1 (1.0%)                 | 2 (7.7%)                 |         |
| Intestinal     | 2 (2.0%)                 | 0 (0%)                   |         |
| UICC           |                          |                          |         |
| 1              | 0 (0%)                   | 0 (0%)                   | *0.51   |
| 2              | 13 (16.0%)               | 2 (8.3%)                 |         |
| 3              | 45 (55.6%)               | 19 (79.2%)               |         |
| 4              | 23 (28.4%)               | 3 (12.5%)                |         |
| NA             | 22                       | 2                        |         |
| pT             |                          |                          |         |
| 1              | 5 (4.9%)                 | 1 (3.8%)                 | *0.51   |
| 2              | 44 (42.7%)               | 9 (34.6%)                |         |
| 3              | 47 (45.6%)               | 15 (57.7%)               |         |
| 4              | 7 (6.8%)                 | 1 (3.8%)                 |         |

|         |            |            |       |  |
|---------|------------|------------|-------|--|
| pN      |            |            |       |  |
| 0       | 24 (45.3%) | 3 (23.1%)  |       |  |
| 1       | 29 (54.7%) | 10 (76.9%) | 0.34  |  |
| X       | 50         | 13         |       |  |
| pM      |            |            |       |  |
| 1       | 20 (19.4%) | 2 (7.7%)   |       |  |
| X       | 83 (80.6%) | 24 (92.3%) | 0.24  |  |
| L       |            |            |       |  |
| 0       | 35 (34.0%) | 13 (50.0%) |       |  |
| 1       | 68 (66.0%) | 13 (50.0%) | 0.17  |  |
| V       |            |            |       |  |
| 0       | 44 (42.7%) | 15 (57.7%) |       |  |
| 1       | 59 (57.3%) | 11 (42.3%) | 0.19  |  |
| Pn      |            |            |       |  |
| 0       | 53 (51.5%) | 14 (53.8%) |       |  |
| 1       | 50 (48.5%) | 12 (46.2%) | 1.00  |  |
| R       |            |            |       |  |
| 0       | 36 (44.4%) | 13 (56.5%) |       |  |
| 1       | 39 (48.1%) | 10 (43.5%) |       |  |
| 2       | 6 (7.4%)   | 0 (0%)     | *0.35 |  |
| X       | 22         | 3          |       |  |
| Grading |            |            |       |  |
| G1      | 3 (2.9%)   | 2 (7.7%)   |       |  |
| G2      | 67 (65.0%) | 10 (38.5%) | *0.07 |  |
| G3      | 33 (32.1%) | 14 (53.8%) |       |  |

Fisher's exact test,  $\chi^2$  test or Mann-Whitney test (age) were used. \*denotes NOS+mucinous+papillary+intestinal vs. adenosquamous+signet ring+solid; UICC 1+2 vs. 3+4; pT1+2 vs. 3+4; R0 vs. R1+2; G1+2 vs. G3. Abbreviations: GBC, gallbladder cancer; UICC, Union for International Cancer Control.

**Table S8.** Clinicopathological characteristics (at 25 CPS cutoff).

| Characteristic | PD-L1 neg.<br>(CPS < 25) | PD-L1 pos.<br>(CPS $\geq$ 25) | p-value |
|----------------|--------------------------|-------------------------------|---------|
| GBC patients   | 116 (89.9%)              | 13 (10.1%)                    |         |
| Age (years)    | 72.9 (63.6–79.7)         | 73.40 (62.–80.5)              | 0.87    |
| Sex            |                          |                               |         |
| Female         | 76 (65.5%)               | 10 (76.9%)                    |         |
| Male           | 40 (34.5%)               | 3 (23.1%)                     | 0.54    |
| Histology      |                          |                               |         |
| NOS            | 58 (50.0%)               | 5 (38.5%)                     |         |
| Mucinous       | 18 (15.5%)               | 1 (7.7%)                      |         |
| Adenosquamous  | 13 (11.2%)               | 3 (23.1%)                     | *0.042  |
| Signet ring    | 14 (12.1%)               | 2 (15.4%)                     |         |
| Papillary      | 10 (8.6%)                | 0 (0%)                        |         |
| Solid          | 1 (0.9%)                 | 2 (15.4%)                     |         |
| Intestinal     | 2 (1.7%)                 | 0 (0.0%)                      |         |

|         |            |            |        |
|---------|------------|------------|--------|
| UICC    |            |            |        |
| 1       | 0 (0%)     | 0 (0%)     |        |
| 2       | 15 (16.1%) | 0 (0%)     |        |
| 3       | 53 (57.0%) | 11 (91.7%) | *0.21  |
| 4       | 25 (26.9%) | 1 (8.3%)   |        |
| NA      | 23         | 1          |        |
| pT      |            |            |        |
| 1       | 6 (5.2%)   | 0 (0%)     |        |
| 2       | 49 (42.2%) | 4 (30.8%)  | *0.38  |
| 3       | 53 (45.7%) | 9 (69.2%)  |        |
| 4       | 8 (6.9%)   | 0 (0%)     |        |
| pN      |            |            |        |
| 0       | 26 (43.3%) | 1 (16.7%)  |        |
| 1       | 34 (56.7%) | 5 (83.3%)  | 0.45   |
| X       | 56         | 7          |        |
| pM      |            |            |        |
| 1       | 21 (18.1%) | 1 (7.7%)   | 0.70   |
| X       | 95 (81.9%) | 12 (92.3%) |        |
| L       |            |            |        |
| 0       | 42 (36.2%) | 6 (46.2%)  | 0.55   |
| 1       | 74 (63.8%) | 7 (53.8%)  |        |
| V       |            |            |        |
| 0       | 52 (44.8%) | 7 (53.8%)  | 0.57   |
| 1       | 64 (55.2%) | 6 (46.2%)  |        |
| Pn      |            |            |        |
| 0       | 59 (50.9%) | 8 (61.5%)  | 0.56   |
| 1       | 57 (49.1%) | 5 (38.5%)  |        |
| R       |            |            |        |
| 0       | 44 (46.8%) | 5 (50.0%)  |        |
| 1       | 44 (46.8%) | 5 (50.0%)  |        |
| 2       | 6 (6.4%)   | 0 (0%)     | *1.00  |
| X       | 22         | 3          |        |
| Grading |            |            |        |
| G1      | 5 (4.3%)   | 0 (0%)     |        |
| G2      | 73 (62.9%) | 4 (30.8%)  | *0.014 |
| G3      | 38 (32.8%) | 9 (69.2%)  |        |

Fisher's exact test,  $\chi^2$  test or Mann-Whitney test (age) were used. \*denotes NOS+mucinous+papillary+intestinal vs. adenosquamous+signet ring+solid; UICC 1 + 2 vs. 3 + 4; pT1+2 vs. 3 + 4; R0 vs. R1+2; G1 + 2 vs. G3. Abbreviations: GBC, gallbladder cancer; UICC, Union for International Cancer Control.
